# Supplementary material for: Exploring the Effect of Structure-Based Scaffold Hopping on the Inhibition of Coxsackievirus A24v Transduction by Pentavalent N-Acetylneuraminic Acid Conjugates
Source: MDPI journal article supplement (doi:10.3390/ijms22168418), 2021-08-05
Supplement: s1 [file s1]

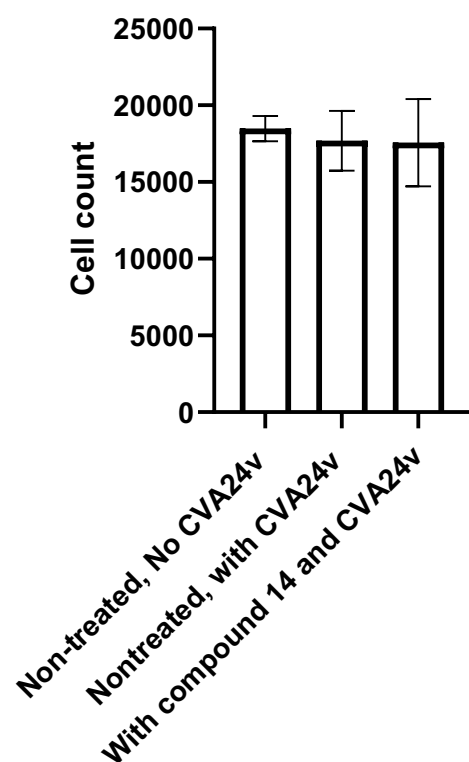

**Figure S1. ME1071 is not toxic towards human corneal epithelial cells based on cell counting.** Cell viability was studied by counting Hoechst stained cells from the highest concentration of compound 14 (1.25 mM) compared to non-treated cells and non-treated cells with only CVA24v infection. The experiment was performed once in duplicate.

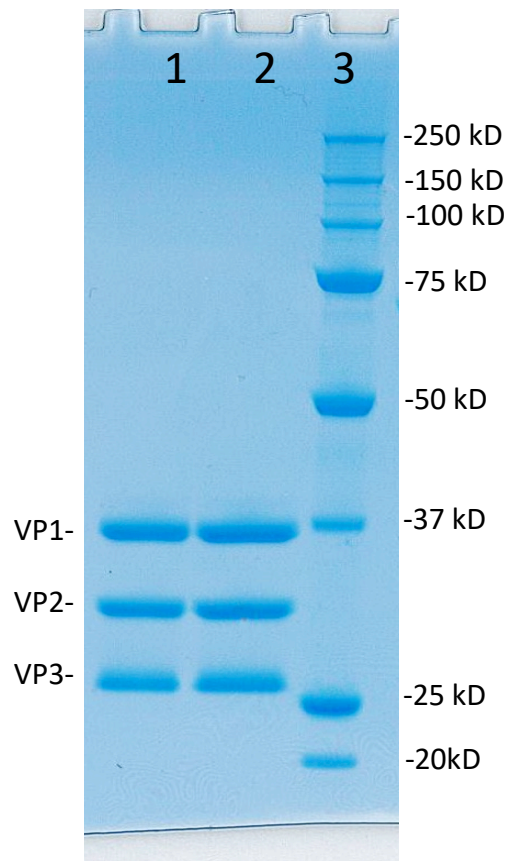

**Figure S2. Coomassie stained protein gel indicates high level of CVA24v purity.** After ultracentrifugation, purified and concentrated CVA24v samples were loaded on a 10% bis-tris gel (Invitrogen) and ran on at 200 V in 3-(N-morpholino)propanesulfonic acid (MOPS) buffer (Invitrogen). After 50 min, the gel was stained with Pageblue protein stain solution (Thermo Fisher) for 24 hours before destaining with water. Lane 1 and 2 show the capsid proteins VP1, VP2 and VP3 (CVA24v from several purifications, pooled into one sample); Lane 3, protein ladder (Thermo Fisher).
